# Supplementary material
Source: PubMed Central journal article supplement (PMC3824603)
Supplement: cdd201377x1.pdf [file cdd201377x1.pdf]

## Supplementary information

### Identification of PTEN at the ER and MAMs and its regulation of Ca<sup>2+</sup> signaling and apoptosis in a protein phosphatase-dependent manner

Angela Bononi, Massimo Bonora, Saverio Marchi, Sonia Missiroli, Federica Poletti, Carlotta Giorgi, Pier Paolo Pandolfi and Paolo Pinton

#### Summary

#### Supplementary Figure Legends

- Supplementary Figure 1.
- Supplementary Figure 2.
- Supplementary Figure 3.
- Supplementary Figure 4.
- Supplementary Video data.

#### Supplementary Figures

#### Supplementary Figure Legends

**Supplementary Figure 1.** Intracellular distributions of PTEN in MEFs. Protein components of subcellular fractions prepared from mouse embryonic fibroblast (MEF) cells were loaded on 10% SDS-polyacrylamide gels and revealed by western blot. PTEN was detected with a specific monoclonal antibody. Marker proteins indicate ER (IP3R3), MAMs (FACL4), cytosol ( $\beta$ -tubulin), nucleus (PCNA) and mitochondria (SOD-2). H: homogenate; Mc: crude mitochondrial fraction; Mp: pure mitochondrial fraction; ER; MAMs; C: cytosol.

**Supplementary Figure 2.** Densitometric analysis and plotting of Akt phosphorylation status presented as the ratio between phosphorylated and total protein. Quantification of WB analysis on HEK-293 lysates from mock- (control) or siRNAs-PTEN transfected cells (**a**), and from cells transfected with either control, PTEN, GFP-PTEN[NLS], GFP-PTEN[NES], snap25-PTEN, AKAP-PTEN or ER-PTEN encoding plasmids (**b**). Densitometry of band intensity is expressed relative to control (100%). Data are mean  $\pm$  SEM from 3 to 5 independent experiments. (**c**) Quantification of Akt phosphorylation in subcellular fractions prepared from HEK-293 cells transfected with recombinant wild type PTEN or ER-PTEN encoding plasmids. Densitometric

analysis of pAkt<sup>Ser473</sup>/Akt bands intensity in homogenate (H), crude mitochondria (Mc), ER, MAM and cytosol (C), is expressed relative to PTEN overexpressing cells (100%). Data are mean  $\pm$  SEM for 3 independent experiments. \* indicates  $P < 0.05$ .

**Supplementary Figure 3.** Effects of ArA on intracellular Ca<sup>2+</sup> mobilization, apoptotic responses and PTEN interaction with IP3R3, Related to Figures 4 and 5. **(a)** Fura-2/AM measurements in HEK-293 cells preincubated with 2  $\mu$ M xestospongine C (XeC) or vehicle for 16 hours. XeC is a membrane-permeable inhibitor of the IP3-mediated Ca<sup>2+</sup> release when used at low micromolar concentrations. In the presence of XeC, the increase of [Ca<sup>2+</sup>]<sub>c</sub> in response to 80  $\mu$ M ArA was significantly depressed, suggesting that the latter involved Ca<sup>2+</sup> release via IP3R. **(i)** Typical tracing of the [Ca<sup>2+</sup>]<sub>c</sub> response is presented as a 340/380 nm ratio. Each of the traces shown is representative of at least three independent experiments. **(ii)** Bars graphs (mean  $\pm$  SEM) show the change in percentage of cytosolic Ca<sup>2+</sup> increases normalized as  $\Sigma(F_{340}/F_{380})$  over time, in comparison to cells incubated with vehicle. **(b)** Fura-2/AM measurements in Ca<sup>2+</sup>-free medium. HEK-293 cells overexpressing PTEN, ER-PTEN, or mock-transfected, were loaded with Fura-2/AM. Where indicated, Ca<sup>2+</sup>-free conditions were obtained as described in Materials and Methods. The basal fluorescence signal was monitored prior to treatment: 1 mM EGTA was added to Ca<sup>2+</sup>-free medium at 15 s to chelate residual Ca<sup>2+</sup>, and 80  $\mu$ M ArA was added at 75 s. Under these conditions, the addition of ArA still stimulated an initial increase in intracellular free Ca<sup>2+</sup>, however, the slower subsequent rise in intracellular Ca<sup>2+</sup> which was detected in the presence of extracellular Ca<sup>2+</sup> (Figures 4a-i and 4b-i) was not observed. **(i)** The kinetic behavior of the [Ca<sup>2+</sup>]<sub>c</sub> response is presented as a 340/380 nm ratio. Each of the traces shown is representative of at least three independent experiments. **(ii)** Bars graphs (mean  $\pm$  SEM) show the change in percentage of cytosolic Ca<sup>2+</sup> increases normalized as  $\Sigma(F_{340}/F_{380})$  over time, in comparison to untransfected cells. **(c)** Densitometric analysis of normalized cleaved caspase-3 protein levels in HEK-293 cells treated with 80  $\mu$ M ArA for 120 min. In the bar graphs mean  $\pm$  SEM is expressed relative to control mock-transfected cells (100%), for 4 independent experiments. **(d)** Quantification of CoIP data presented in Figure 5c. Protein levels were normalized to the IgG light chain bands. Densitometry of bands intensity is expressed relative to untreated control (100%). Data are mean  $\pm$  SEM for 3 independent experiments.

**Supplementary Figure 4.** Regulation of ER Ca<sup>2+</sup> mobilization requires PTEN protein, but not lipid, phosphatase activity, Related to Figure 6. **(a)** Densitometric quantification of WB and plotting of the pAkt<sup>Ser473</sup>/Akt ratios is expressed relative to ER-PTEN transfected cells (100%).

Normalization between phosphorylated Akt and Akt indicates an increased of phosphorylation in HEK-293 cells lysate from ER-PTEN(C124S) transfected HEK-293 cells in comparison to ER-PTEN or ER-PTEN(G129E) transfected cells. Data are mean  $\pm$  SEM for 5 independent experiments. **(b)** HEK-293 cells overexpressing ER-PTEN, ER-PTEN(C124S), ER-PTEN(G129E) or mock-transfected, were loaded with Fura-2/AM to measure changes in intracellular  $\text{Ca}^{2+}$  response induced by ArA in  $\text{Ca}^{2+}$ -free conditions, as in Supplementary Figure 3a. **(i)** The kinetic behavior of the  $[\text{Ca}^{2+}]_c$  response is presented as a 340/380 nm ratio. Each of the traces shown is representative of at least three independent experiments. **(ii)** Bars graphs (mean  $\pm$  SEM) show the change in percentage of cytosolic  $\text{Ca}^{2+}$  increases normalized as  $\Sigma(\text{F}_{340}/\text{F}_{380})$  over time, in comparison to untransfected cells. **(c)** Quantification of CoIP data presented in Figure 6g. Protein levels were normalized to the IgG light chain bands. Densitometry of bands intensity is expressed relative to ER-PTEN(C124S) transfected cells (100%). Data are mean  $\pm$  SEM for 3 independent experiments. \* indicates  $P < 0.05$ .

**Supplementary Video data.** Increased localization of PTEN at the ER induced by ArA treatment, Related to Figure 5. Cells were transfected with GFP tagged PTEN (GFP-PTEN) or GFP. At 48 hours after transfection, cells were labeled with ER-tracker RED (Life Technologies), according to the manufacturer's protocol. Time-lapse recording during 80  $\mu\text{M}$  ArA treatment was performed as in Figure 5a. **(Video 1 and Video 2)** Time-lapse recording of GFP-PTEN dynamics during ArA treatment; GFP-PTEN (left), ER-Tracker (middle) and merged (right). **(Video 3)** Time-lapse recording of GFP dynamics during ArA treatment; GFP (left), ER-Tracker (middle) and merged (right). Times are shown in the bottom left corner of the frame.

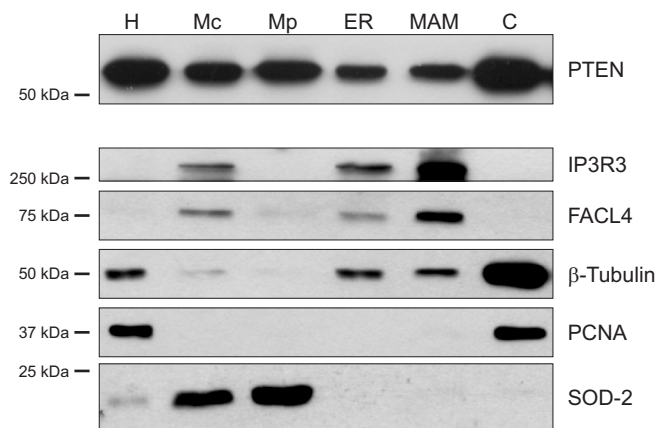

**Supplementary Figure 1**

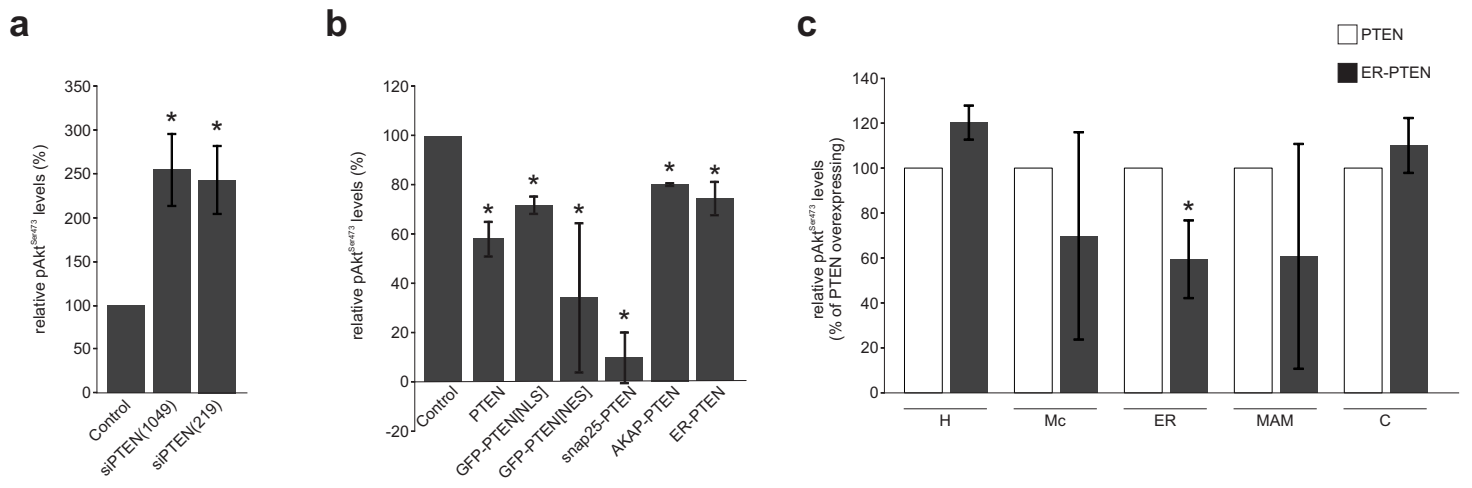

**Supplementary Figure 2**

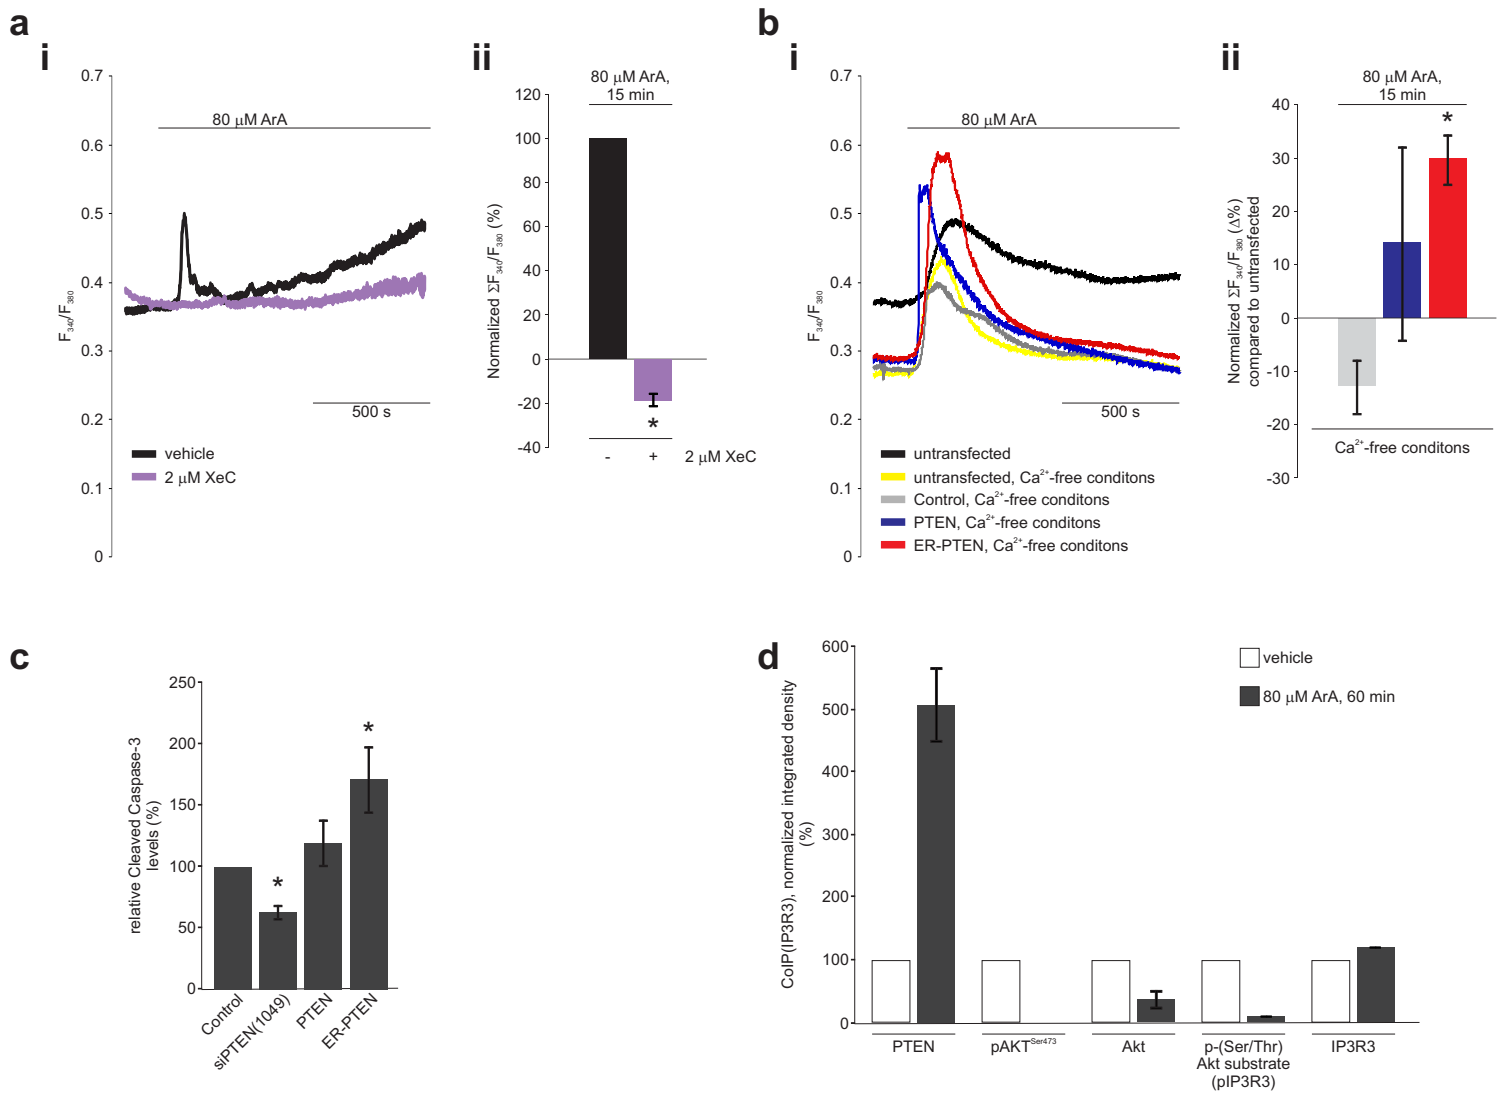

Supplementary Figure 3

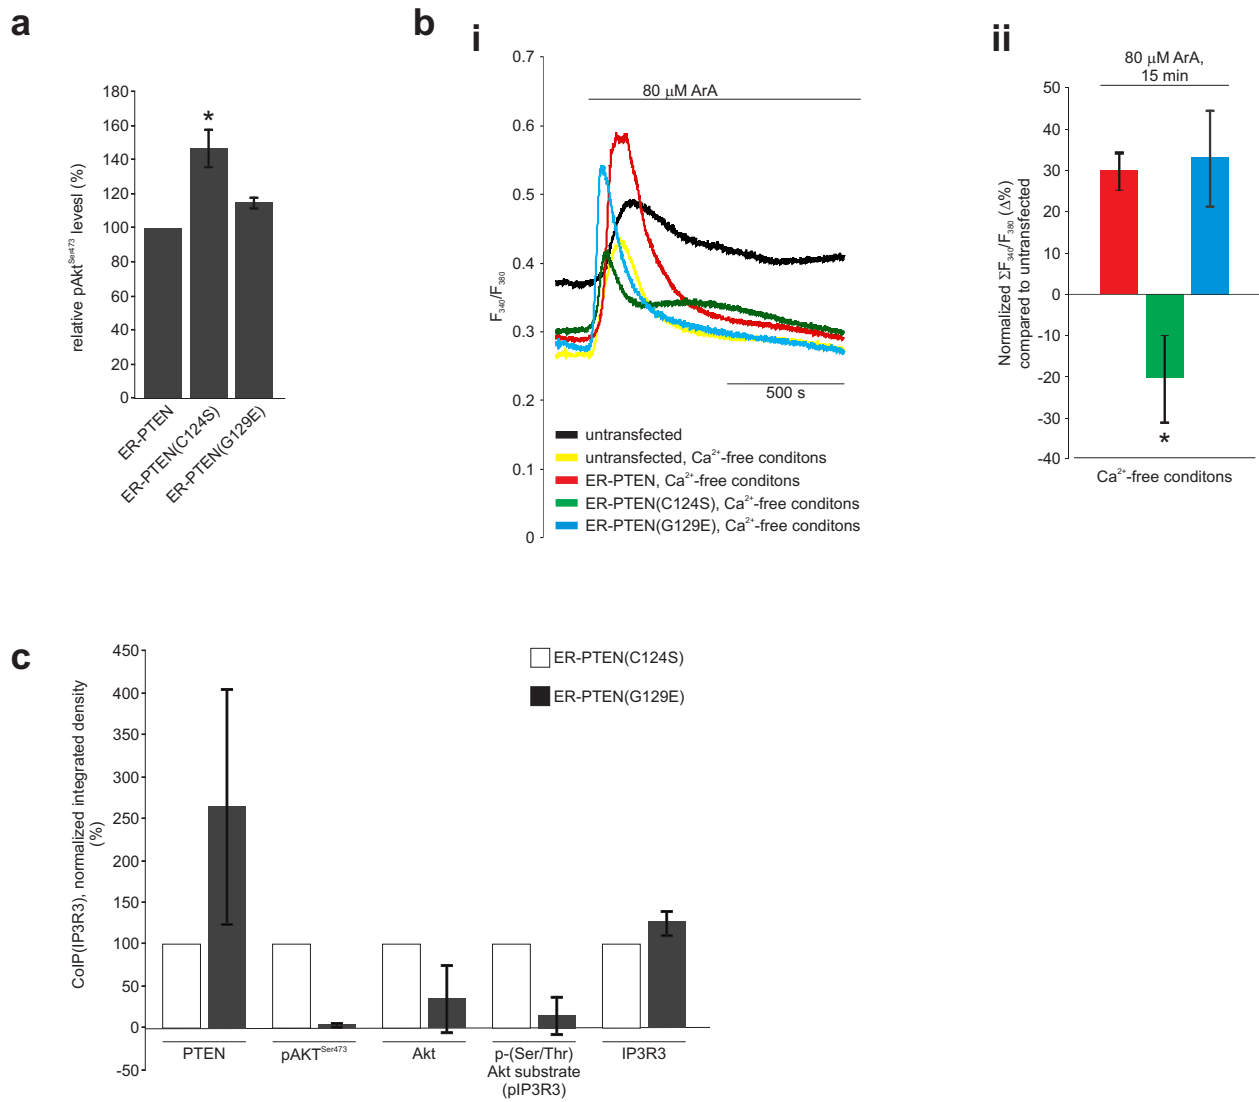

**Supplementary Figure 4**
